# Supplementary material for: The Mutation of Glu at Amino Acid 3838 of AtMDN1 Provokes Pleiotropic Developmental Phenotypes in Arabidopsis
Source: PubMed Central journal article supplement (PMC5099923; doi:10.1038/srep36446), 2016-11-08
Supplement: srep36446-s1.pdf [file srep36446-s1.pdf]

**Title: The Mutation of Glu at Amino Acid 3838 of AtMDN1 Provokes Pleiotropic Development Phenotypes in Arabidopsis**

Peng-Cheng Li<sup>1,2†</sup>, Shao-Wei Yu<sup>1†</sup>, Ke Li<sup>3</sup>, Jin-Guang Huang<sup>1</sup>, Xing-Jun Wang<sup>2</sup>, and Cheng-Chao Zheng<sup>1\*</sup>

**Affiliations:**

<sup>1</sup>State Key Laboratory of Crop Biology, College of Life Sciences, Shandong Agricultural University, Tai'an, Shandong, PR China

<sup>2</sup>Bio-Tech Research Center, Shandong Academy of Agricultural Sciences, Shandong Provincial Key Laboratory of Crop Genetic Improvement, Ecology and Physiology, Jinan, Shandong, PR China

<sup>3</sup>College of Life Sciences, Shandong University, Ji'nan, Shandong, PR China

<sup>†</sup>These authors contributed equally to this work.

\*Correspondence and requests for materials should be addressed to C-C.Z. (e-mail: cczheng@sdau.edu.cn)

**Supplementary information**

Supplementary Figure 1. Phenotype of *mdn1* heterozygote.

Supplementary Figure 2. Conservation analysis of MDN1 proteins.

Supplementary Figure 3. Expression pattern analysis of *AtMDN1* using public database.

Supplementary Figure 4. Pearson correlation analysis of different samples. rep, repeats.

Supplementary Table 1. Key primers used in this study.

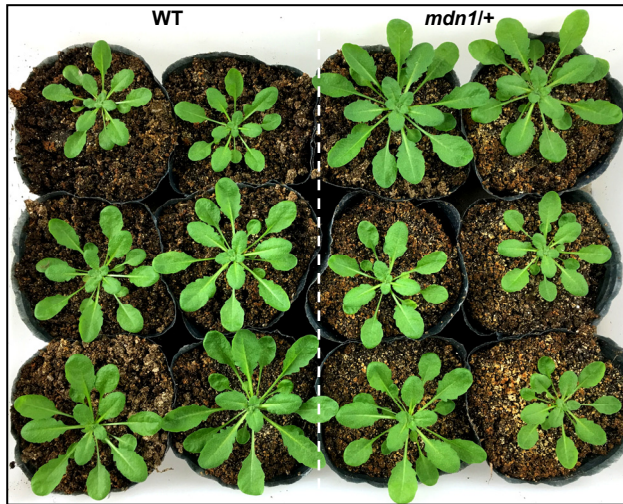

**Supplementary Figure 1. Phenotype of *mdn1* heterozygote.**

Wild type and heterozygote of *mdn1* are grown for 4 weeks under normal conditions.

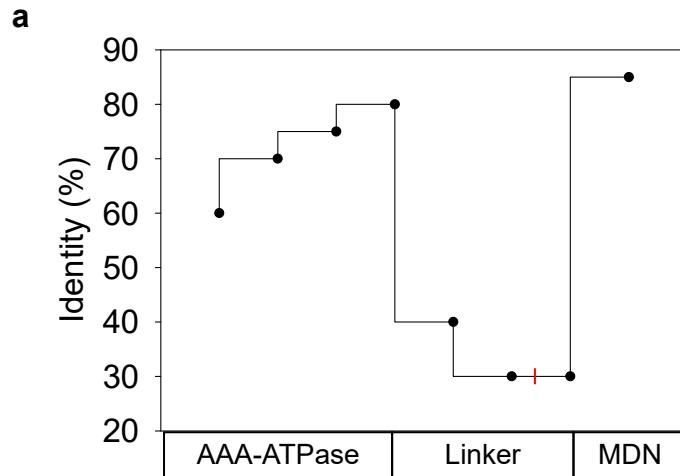

**b**

|                      |                                 |
|----------------------|---------------------------------|
| <i>A. thaliana</i>   | ISQSLVEFIETSNVGEFRRRLQLLFCFLLQL |
| <i>D. rerio</i>      | VSSSLQAFIEGSTLGEFVSRLSMLLGFHCHI |
| <i>S. cerevisiae</i> | LVSSLNLFFSKSTLGEFNARLDLVKAFYKHI |
| <i>M. musculus</i>   | LVSTLQAFIEGSSLGEFHVRLQMLLVFHCHV |
| <i>H. sapiens</i>    | LVSTLQAFIEGSSLGEFHVRLQMLLVFHCHV |

GEF

**Supplementary Figure 2. Conservation analysis of MDN1 proteins.**

(a) Conservation analysis of the AAA, the linker, and the MIDAS (MDN) domains in MDN1 homologues of organisms showed in **b** and Fig. 3a. The red bar indicates the mutation site of *dsr1*.

(b) Conservation analysis of the GEF motif in MDN1 homologues of *Danio rerio* (XP\_003200751.2), *Saccharomyces cerevisiae* (NP\_013207.1), *Mus musculus* (XP\_006537539.1) and *Homo sapiens* (NP\_055426.1).

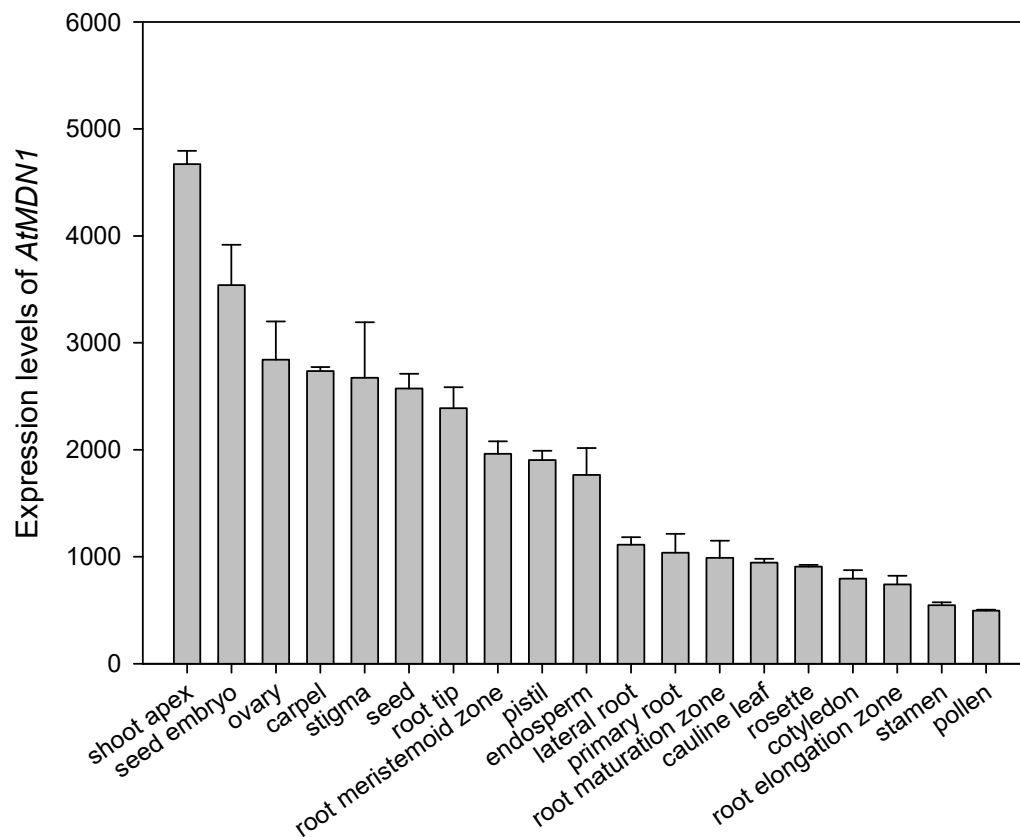

**Supplementary Figure 3. Expression pattern analysis of *AtMDN1* using public database.**

Tissue-specific expression pattern of *AtMDN1*. The data are collected from Genevestigator.

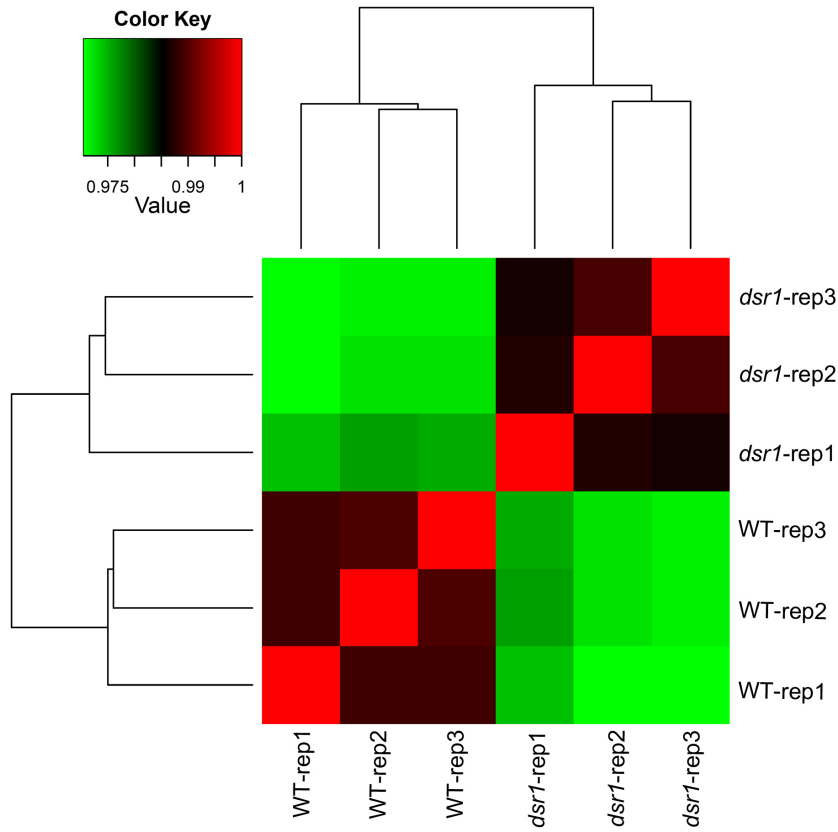

**Supplementary Figure 4.** Pearson correlation analysis of different samples. rep, repeats.

## Supplementary Table 1. Key primers used in this study.

| Purpose                | Primer name            | Sequence (5'-3')      |
|------------------------|------------------------|-----------------------|
| <i>AtMDN1 promoter</i> | forward (P1)           | ATCCAAAATGGTCAGCTG    |
|                        | reverse (P2)           | TGAAACCTGTTGACAAAC    |
| qRT- PCR               | <i>MDN1</i> -forward   | GTCACATGATCGGTCTAG    |
|                        | <i>MDN1</i> -reverse   | CCCTGTTTCTCCTACTAAG   |
|                        | <i>PCAP2</i> -forward  | ACCGGAGGAAATAATTGC    |
|                        | <i>PCAP2</i> -reverse  | CTGGCTTCTTCTCTTCCA    |
|                        | <i>GOX3</i> -forward   | GATGGAATATGAGAAGATCG  |
|                        | <i>GOX3</i> -reverse   | GGCATAGAAATATTAACCCTA |
|                        | <i>FER2</i> - forward  | CTACCCCTTTTGTTCCTC    |
|                        | <i>FER2</i> - reverse  | CTGTCAAAGTAGGCATAC    |
|                        | <i>PER1</i> - forward  | GGTCCTGACAGTAAGATAA   |
|                        | <i>PER1</i> - reverse  | GTGGCGATCTTGTTATTG    |
|                        | <i>RAD50</i> - forward | GACACTGAATCGAGAAAG    |
|                        | <i>RAD50</i> - reverse | CCTGTTCCGTCTTCTTTA    |
|                        | <i>EM6</i> -forward    | GAAGGATATCAGCAGATG    |
|                        | <i>EM6</i> -reverse    | GGTCCTGAATTGGATTG     |
|                        | <i>CRC</i> -forward    | TGGTGAAGTACTATAAGA    |
|                        | <i>CRC</i> -reverse    | TCTGCTTCTTCTCAGGAG    |
|                        | <i>SMC3</i> -forward   | CTCGTGCTAATCCTTACTA   |
|                        | <i>SMC3</i> -reverse   | TCCGTTTATTTCTGTTTC    |
|                        | <i>TOP2</i> -forward   | GACCTTACTTCTCATTGC    |
|                        | <i>TOP2</i> -reverse   | GCACAACATCAATTCAA     |
|                        | <i>GRF5</i> -forward   | CTCTCATTACCAACAAC     |
|                        | <i>GRF5</i> -reverse   | AGCAGAATAAGTAGTAGAAGA |
|                        | <i>ELIP2</i> -forward  | CAAGCCTAAGGTGAGTAC    |
|                        | <i>ELIP2</i> -reverse  | TCCCTTTGATAACTCCATG   |
|                        | <i>PAP85</i> -forward  | TCTCCTTATCTCCATAGC    |
|                        | <i>PAP85</i> -reverse  | GGAACCAATCACTGAAAC    |
| <i>Actin2</i> -forward | CTTCGTCTTCCACTTCAG     |                       |
| <i>Actin2</i> -reverse | ATCATACCAGTCTCAACAC    |                       |
